# Supplementary material for: Investigation of phyllosphere Microorganism-Azolla Interaction: Insights into Incidence Rates and Metagenomic Analysis
Source: Research Square preprint supplement (doi:10.21203/rs.3.rs-3214610/v1), 2023-08-16
Supplement: Supplementary file 1 [file 3e6fa12d8c2533364136bcf9.docx]

Supplementary Table 2 Composition of Cultivation Substrate

| Composition | Percentage | Concentration (mg/kg) |
| --- | --- | --- |
| Organic matter | 1.80 % | - |
| Total nitrogen | 0.11 % | - |
| Full potassium | 0.66 % | - |
| Whole phosphorus | 0.17 % | - |
| Alkali-hydrolyzable nitrogen | - | 104.23 |
| Effective phosphorus | - | 10.43 |
| Fast-acting potassium | - | 30.30 |
| pH | 4.4 | |
