# Supplementary material for: Investigation of phyllosphere Microorganism-Azolla Interaction: Insights into Incidence Rates and Metagenomic Analysis
Source: Research Square preprint supplement (doi:10.21203/rs.3.rs-3214610/v1), 2023-08-16
Supplement: Supplementary file 2 [file 4eaf21465570c0c550f32aac.docx]

Supplementary Table 1 Summary of raw sequencing data quality

| Sample | Raw Reads | Clean Reads | Clean Bases | Error Rate | Q20 | Q30 | GC Content |
| --- | --- | --- | --- | --- | --- | --- | --- |
| Aim_1_1 | 18699844 | 18595104 | 2.79G | 0.02% | 98.19% | 94.70% | 54.86% |
| Aim_1_2 | 18699844 | 18595104 | 2.79G | 0.03% | 96.86% | 91.58% | 54.90% |
| Aim_2_1 | 22294771 | 22168032 | 3.33G | 0.02% | 98.27% | 94.93% | 54.09% |
| Aim_2_2 | 22294771 | 22168032 | 3.33G | 0.03% | 96.76% | 91.34% | 54.15% |
| Aim_3_1 | 20757874 | 20641844 | 3.10G | 0.02% | 98.29% | 95.00% | 54.99% |
| Aim_3_2 | 20757874 | 20641844 | 3.10G | 0.03% | 97.27% | 92.49% | 55.02% |
| Api_1_1 | 21896967 | 21817171 | 3.27G | 0.02% | 98.51% | 95.41% | 48.68% |
| Api_1_2 | 21896967 | 21817171 | 3.27G | 0.03% | 97.65% | 93.16% | 48.71% |
| Api_2_1 | 16892472 | 16784431 | 2.52G | 0.02% | 98.17% | 94.68% | 48.33% |
| Api_2_2 | 16892472 | 16784431 | 2.52G | 0.03% | 96.53% | 90.86% | 48.39% |
| Api_3_1 | 19094923 | 18985976 | 2.85G | 0.02% | 98.18% | 94.69% | 53.70% |
| Api_3_2 | 19094923 | 18985976 | 2.85G | 0.03% | 96.69% | 91.24% | 53.76% |

1. Sample：Sample names, _1, _2 indicate read1, read2, respectively
   (2) Raw Reads：Count the number of sequencing reads in each file, with four lines as one unit.

(3) Raw Bases：Multiply the number of raw reads by the length of the sequencing sequence to obtain the total number of bases, measured in G (gigabases).
(4) Clean Reads：Clean reads Same calculation method as Raw Reads, but counting the files with filtered sequencing data. All subsequent bioinformatics analyses are based on Clean Reads.
(5) Clean Bases：Multiply the number of clean reads by the length of the sequencing sequence to obtain the total number of bases, measured in G.
(6) Error Rate：The sequencing error rate, calculated using the formula Qphred = -10log10(e).
(7) Q20：The percentage of bases with a correct identification rate of 99% or higher.
(8) Q30：The percentage of bases with a correct identification rate of 99.9% or higher.
(9) GC Content：The percentage of the total number of G and C bases out of the total number of bases.
